# Supplementary material for: Cellular Uptake of siRNA-Loaded Nanocarriers to Knockdown PD-L1: Strategies to Improve T-cell Functions
Source: PubMed Central journal article supplement (PMC7565787; doi:10.3390/cells9092043), 2020-09-07
Supplement: cells-09-02043-s001.pdf [file cells-09-02043-s001.pdf]

Supporting Information

NC1

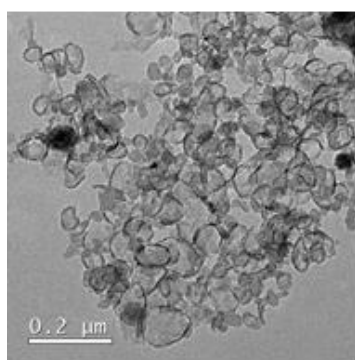

NC2

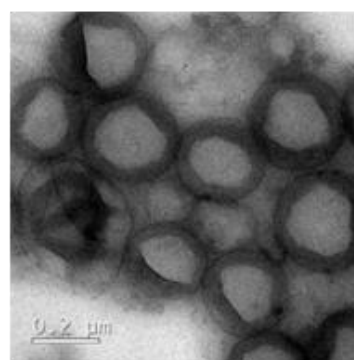

**Oligo Cy5-CTAC**

**Figure S1.** TEM micrographs of SiNCs.
